# Supplementary material for: Whole-exome sequencing identifies novel candidate predisposition genes for familial polycythemia vera
Source: PubMed Central journal article supplement (PMC5397753; doi:10.1186/s40246-017-0102-x), 2017-04-20

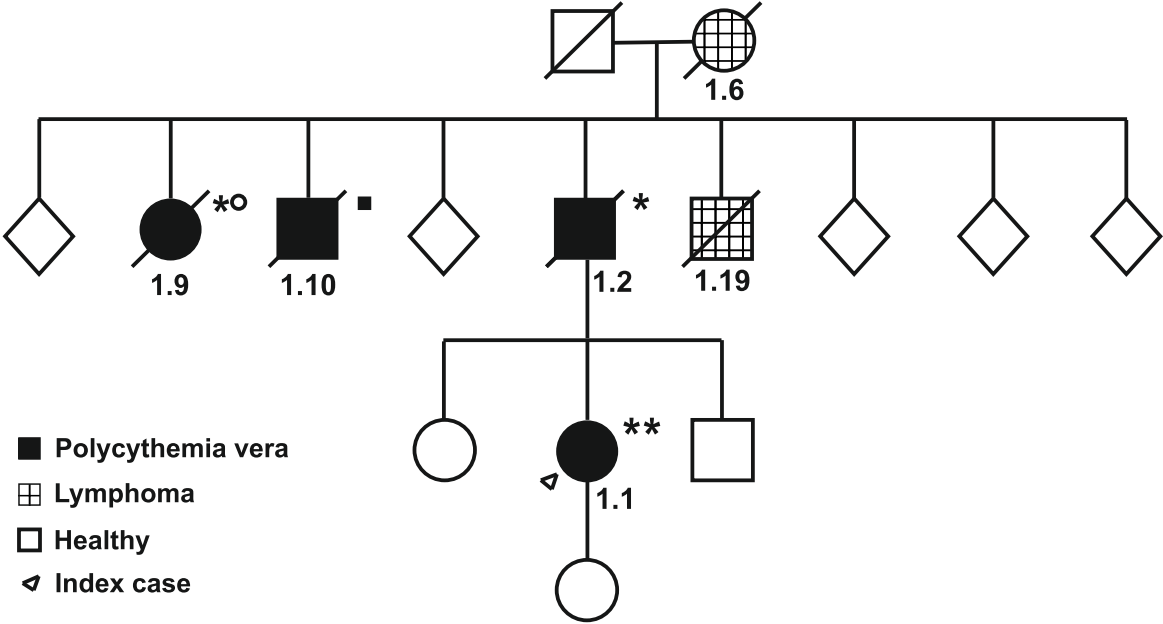

Supplement: 40246_2017_102_MOESM1_ESM.pdf [file 40246_2017_102_MOESM1_ESM.pdf]
